# Supplementary material for: DFT calculations for single-atom confinement effects of noble metals on monolayer g-C3N4 for photocatalytic applications
Source: Royal Society of Chemistry journal article supplement (doi:10.1039/d0ra09815a), 2021-01-01
Supplement: d0ra09815a1.pdf [file d0ra09815a1.pdf]

## Supporting information for

### DFT calculations for single-atom confinement effects of noble metals on monolayer g-C<sub>3</sub>N<sub>4</sub> for photocatalytic applications

Cheng Yang,<sup>ab</sup> Zong-Yan Zhao,<sup>\*c</sup> Hai-Tang Wei,<sup>a</sup> Xi-Yu Deng<sup>a</sup> and Qing-Ju Liu<sup>\*a</sup>

<sup>a</sup> School of Materials and Energy, National Center for International Research on Photoelectric and Energy Materials, Yunnan Key Laboratory for Micro/Nano Materials & Technology, Yunnan University, Kunming 650091, P. R. China. E-mail: qjliu@ynu.edu.cn; Fax: +86-871-65032713; Tel: +86-871-65032713

<sup>b</sup> School of Optoelectronic and Communication Engineering, Yunnan Open University, Kunming 650223, P. R. China.

<sup>c</sup> Faculty of Materials Science and Engineering, Kunming University of Science and Technology, Kunming 650093, P. R. China. E-mail: zzy@kmust.edu.cn;

Fax: +86-871-65107922; Tel: +86-871-65109952.

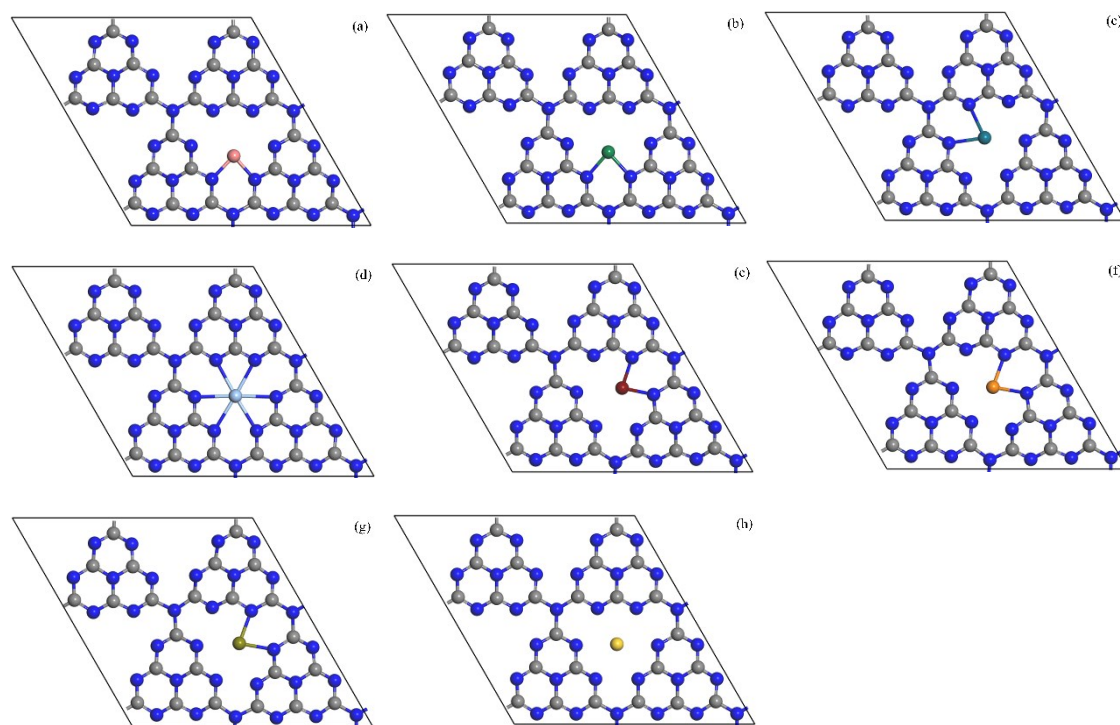

**Fig.S1** Top view of optimized structure for NM1@g-C<sub>3</sub>N<sub>4</sub>, NM=(a) Ru, (b) Rh, (c) Pd, (d) Ag, (e) Os, (f) Ir, (g) Pt, (h) Au. The balls in gray and blue represent the C and N atoms, respectively.

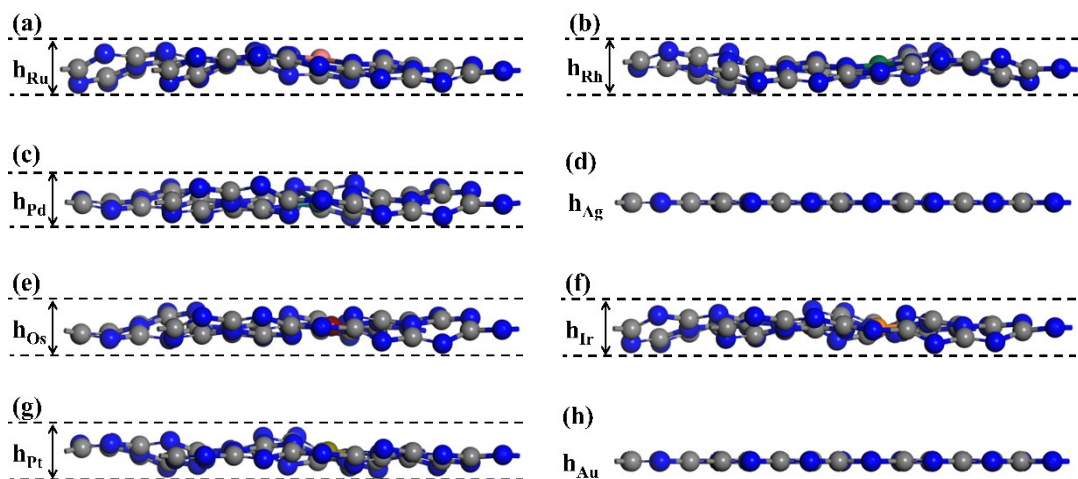

**Fig.S2** Side view of optimized structure for NM1@g-C3N4, NM=(a) Ru, (b) Rh, (c) Pd, (d) Ag, (e) Os, (f) Ir, (g) Pt, (h) Au. The balls in gray and blue represent the C and N atoms, respectively.
